# Supplementary material
Source: PubMed Central journal article supplement (PMC7817205)
Supplement: pnas.2015887118.sapp.pdf [file pnas.2015887118.sapp.pdf]

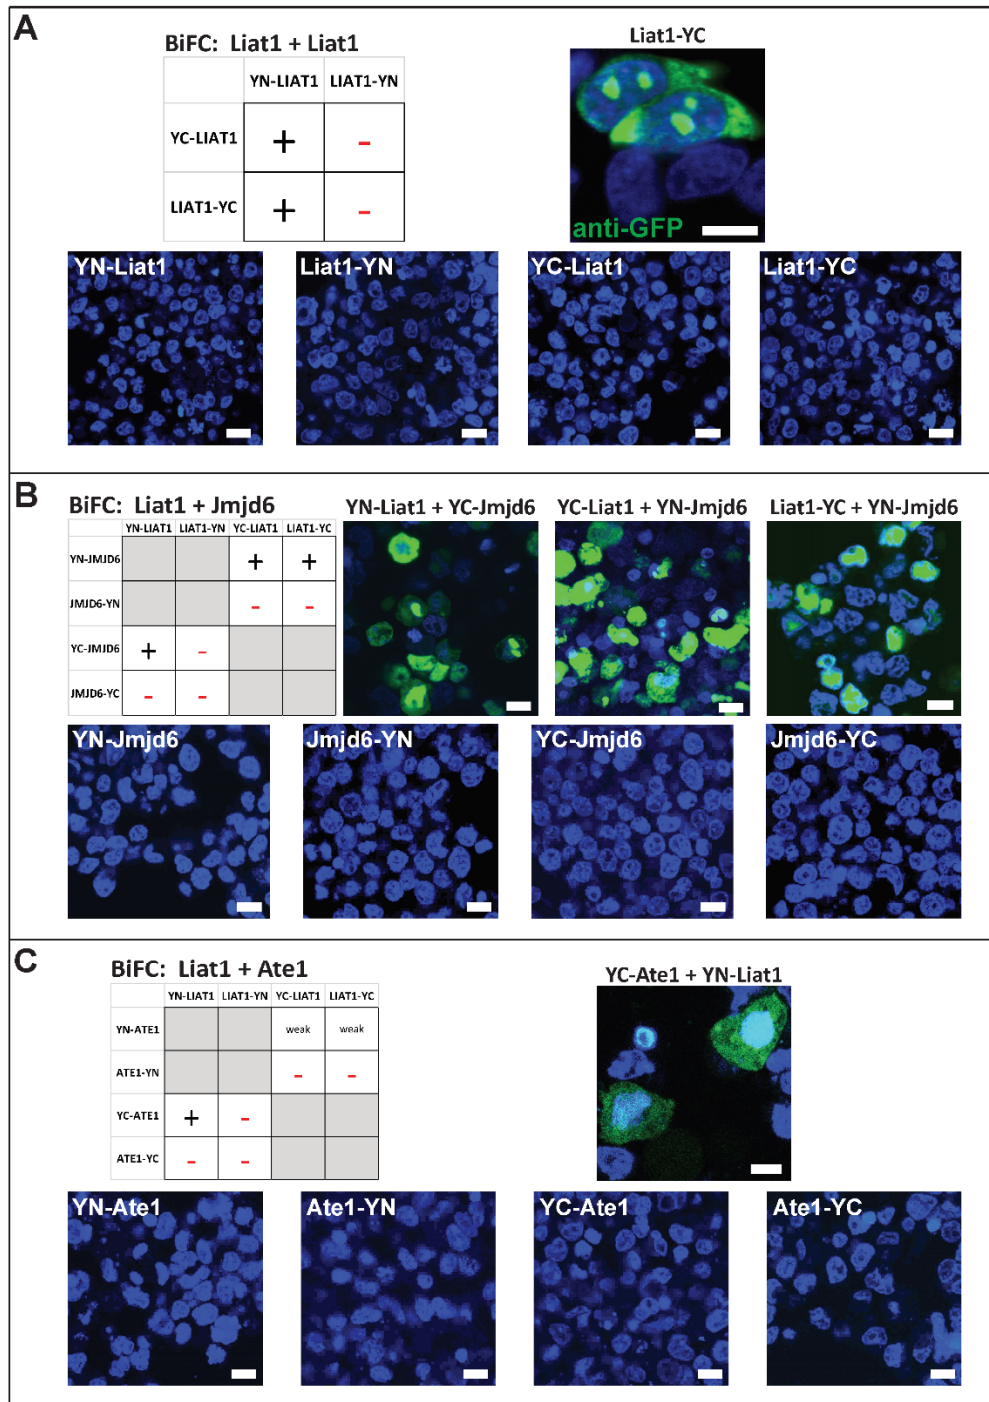

**Supplemental Fig. Bimolecular Fluorescence Complementation (BiFC) platforms.** (A) *Upper left panel*, table of BiFC detected by Liat1 self-interaction using indicated plasmid combinations. “+” indicates reconstituted fluorescence and “-” indicates absence of fluorescence. *Upper right panel*, Liat1-YC expression detected with an anti-GFP antibody. *Lower panels*, lack of BiFC detected with the individual indicated plasmids. (B) *Upper left panel*, table of Liat1-Jmj6 BiFC detected. *Upper right panel*, Liat1-Jmj6 BiFC detected with indicated plasmid combinations. *Lower panels*, lack of BiFC detected with the individual indicated plasmids. (C) Same as in B except with Liat1-Ate1 BiFC. *White bars*, 10  $\mu$ m. DAPI, 4'-6-diamidino-2-phenylindole.

**Supplemental Table S1.** Plasmids used in this study.

| Plasmid        | Description                                                                                                                                                                                                                     | Source or Reference |
|----------------|---------------------------------------------------------------------------------------------------------------------------------------------------------------------------------------------------------------------------------|---------------------|
| pCDNA3.0-Neo   | Amp <sup>R</sup> ; Neo <sup>R</sup> ; Expression vector for cloning your gene of interest from the CMV promoter.                                                                                                                | Invitrogen          |
| pCDNA3.1-Hyg   | Amp <sup>R</sup> ; Hyg <sup>R</sup> ; Expression vector for cloning a gene of interest.                                                                                                                                         | Invitrogen          |
| pACT2          | Amp <sup>R</sup> ; <i>LEU2</i> selectable marker in yeast. Y2H expression vector with P <sub>ADHI</sub> promoter. Produces ha-tagged Gal4-AD fusion.                                                                            | Clontech            |
| pAS2           | Amp <sup>R</sup> ; (also called pAS1-CYH2); <i>CYH</i> selectable marker in yeast. Y2H expression vector with P <sub>ADHI</sub> promoter. Produces ha-tagged Gal4-DBD fusion.                                                   | Clontech            |
| pEGFP-N1       | Kan <sup>R</sup> ; Neo <sup>R</sup> ; eGFP expression vector under the control of mammalian P <sub>CMV</sub> promoter.                                                                                                          | Clontech            |
| pEYFP-N1       | Kan <sup>R</sup> ; Neo <sup>R</sup> ; eYFP expression vector under the control of mammalian P <sub>CMV</sub> promoter.                                                                                                          | Clontech            |
| LentiCRISPR v2 | Amp <sup>R</sup> ; Pur <sup>R</sup> ; lentivirus CRISPR mammalian expression vector. Cas9 is expressed by the P <sub>EF-1<math>\alpha</math></sub> promoter; the single-guide RNA is expressed by the P <sub>U6</sub> promoter. | (1)                 |
| pAA01          | Amp <sup>R</sup> ; pcDNA3.1-based plasmid encoding mouse 3xHA <sup>Liat1</sup> $\Delta$ E <sup>(<math>\Delta</math>14-23)</sup> under the control of mammalian P <sub>CMV</sub> promoter.                                       | Present study       |
| pAA02          | Amp <sup>R</sup> ; pcDNA3.1-based plasmid encoding mouse 3xHA <sup>Liat1</sup> $\Delta$ K <sup>(<math>\Delta</math>53-60)</sup> under the control of mammalian P <sub>CMV</sub> promoter.                                       | Present study       |
| pAA03          | Kan <sup>R</sup> ; pEGFP-N1-based vector containing the IDR of mouse Liat1 <sup>(1-118)</sup> fused to the eGFP cDNA to express 3xHA <sup>IDR</sup> -GFP under the control of mammalian P <sub>CMV</sub> promoter.              | Present study       |
| pAA05          | Amp <sup>R</sup> ; LentiCRISPR v2-based plasmid expressing <i>S. pyogenes</i> Cas9 and CRISPR <sup>Liat1</sup> -A.                                                                                                              | Present study       |

|         |                                                                                                                                                                            |               |
|---------|----------------------------------------------------------------------------------------------------------------------------------------------------------------------------|---------------|
| pAA06   | Amp <sup>R</sup> ; LentiCRISPR v2-based plasmid expressing <i>S. pyogenes</i> Cas9 and CRISPR <sup>Liat1</sup> -B.                                                         | Present study |
| pCER020 | Amp <sup>R</sup> ; pACT2-based plasmid encoding Gal4-AD fused to <sup>ha</sup> Liat1( <sup>Δ</sup> 1-124) under the control of the yeast P <sub>ADHI</sub> promoter.       | (2)           |
| pCER021 | Amp <sup>R</sup> ; pACT2-based plasmid encoding Gal4-AD fused to <sup>ha</sup> Liat1( <sup>113-165</sup> ) under the control of the yeast P <sub>ADHI</sub> promoter.      | (2)           |
| pCER022 | Amp <sup>R</sup> ; pACT2-based plasmid encoding Gal4-AD fused to <sup>ha</sup> Liat1( <sup>Δ</sup> 153-228) under the control of the yeast P <sub>ADHI</sub> promoter.     | (2)           |
| pCB179  | Amp <sup>R</sup> ; pcDNA3.1-based plasmid encoding mouse <sup>3xHA</sup> Liat1 under the control of the mammalian P <sub>CMV</sub> promoter.                               | (2)           |
| pCB239  | Amp <sup>R</sup> ; pAS2-based plasmid encoding Gal4-DBD domain fused to <sup>ha</sup> Liat1( <sup>1-228</sup> ) under the control of the yeast P <sub>ADHI</sub> promoter. | (2)           |
| pCB409  | Amp <sup>R</sup> ; pH10UE-based vector used for the bacterial expression of a fusion between His <sub>10</sub> -ubiquitin and Ate1 <sup>1A7A</sup> .                       | (2)           |
| pCB432  | Amp <sup>R</sup> ; pACT2-based plasmid encoding Gal4-AD fused to <sup>ha</sup> Liat1( <sup>1-228</sup> ) under the control of the yeast P <sub>ADHI</sub> promoter.        | (2)           |
| pCB433  | Amp <sup>R</sup> ; pACT2-based plasmid encoding Gal4-AD fused to <sup>ha</sup> Liat1( <sup>61-228</sup> ) under the control of the yeast P <sub>ADHI</sub> promoter.       | (2)           |
| pCB434  | Amp <sup>R</sup> ; pACT2-based plasmid encoding Gal4-AD fused to <sup>ha</sup> Liat1( <sup>113-228</sup> ) under the control of the yeast P <sub>ADHI</sub> promoter.      | (2)           |
| pCB435  | Amp <sup>R</sup> ; pACT2-based plasmid encoding Gal4-AD fused to <sup>ha</sup> Liat1( <sup>135-228</sup> ) under the control of the yeast P <sub>ADHI</sub> promoter.      | (2)           |

|        |                                                                                                                                                                                  |               |
|--------|----------------------------------------------------------------------------------------------------------------------------------------------------------------------------------|---------------|
| pCB436 | Amp <sup>R</sup> ; pACT2-based plasmid encoding Gal4-AD fused to <sup>ha</sup> Liat1 <sup>(135-165)</sup> under the control of the yeast P <sub>ADHI</sub> promoter.             | (2)           |
| pCB437 | Amp <sup>R</sup> ; pACT2-based plasmid encoding Gal4-AD fused to <sup>ha</sup> Liat1 <sup>(1-165)</sup> under the control of the yeast P <sub>ADHI</sub> promoter.               | (2)           |
| pCB439 | Amp <sup>R</sup> ; pACT2-based plasmid encoding Gal4-AD fused to <sup>ha</sup> Liat1 <sup>(95-228)</sup> under the control of the yeast P <sub>ADHI</sub> promoter.              | (2)           |
| pCB458 | Amp <sup>R</sup> ; pcDNA-Neo-based plasmid encoding Jmjd6 <sup>3xflag</sup> under the control of the mammalian P <sub>CMV</sub> promoter.                                        | (2)           |
| pCB481 | Amp <sup>R</sup> ; Neo <sup>R</sup> ; pcDNA3.0-based plasmid expressing the N-terminal portion of eYFP (amino acids 1-154) and linker upstream of the multiple cloning site.     | Present study |
| pCB482 | Amp <sup>R</sup> ; Neo <sup>R</sup> ; pcDNA3.0-based plasmid expressing the C-terminal portion of eYFP (amino acids 154-238) and linker upstream of the multiple cloning site.   | Present study |
| pCB483 | Amp <sup>R</sup> ; Neo <sup>R</sup> ; pcDNA3.0-based plasmid expressing the linker and N-terminal portion of eYFP (amino acids 1-154) downstream of the multiple cloning site.   | Present study |
| pCB484 | Amp <sup>R</sup> ; Neo <sup>R</sup> ; pcDNA3.0-based plasmid expressing the linker and C-terminal portion of eYFP (amino acids 154-238) downstream of the multiple cloning site. | Present study |
| pCB486 | Amp <sup>R</sup> ; pCB481-based plasmid expressing the N-terminal half of eYFP (amino acids 1-154) fused to Ate1 <sup>1A7A</sup> (YN-ATE1) from the P <sub>CMV</sub> promoter.   | Present study |
| pCB487 | Amp <sup>R</sup> ; pCB482-based plasmid expressing the C-terminal half of eYFP (amino acids 154-238) fused to Ate1 <sup>1A7A</sup> (YC-ATE1) from the P <sub>CMV</sub> promoter. | Present study |

|        |                                                                                                                                                                                  |               |
|--------|----------------------------------------------------------------------------------------------------------------------------------------------------------------------------------|---------------|
| pCB488 | Amp <sup>R</sup> ; pCB483-based plasmid expressing Ate1 <sup>1A7A</sup> fused to the N-terminal half of eYFP (amino acids 1-154) (ATE1-YN) from the P <sub>CMV</sub> promoter.   | Present study |
| pCB489 | Amp <sup>R</sup> ; pCB484-based plasmid expressing Ate1 <sup>1A7A</sup> fused to the C-terminal half of eYFP (amino acids 154-238) (ATE1-YC) from the P <sub>CMV</sub> promoter. | Present study |
| pCB490 | Amp <sup>R</sup> ; pCB481-based plasmid expressing the N-terminal half of eYFP (amino acids 1-154) fused to Liat1 (YN-Liat1) from the P <sub>CMV</sub> promoter.                 | Present study |
| pCB491 | Amp <sup>R</sup> ; pCB482-based plasmid expressing the C-terminal half of eYFP (amino acids 154-238) fused to Liat1 (YC-Liat1) from the P <sub>CMV</sub> promoter.               | Present study |
| pCB492 | Amp <sup>R</sup> ; pCB483-based plasmid expressing Liat1 fused to the N-terminal half of eYFP (amino acids 1-154) (Liat1-YN) from the P <sub>CMV</sub> promoter.                 | Present study |
| pCB493 | Amp <sup>R</sup> ; pCB484-based plasmid expressing Liat1 fused to the C-terminal half of eYFP (amino acids 154-238) (Liat1-YC) from the P <sub>CMV</sub> promoter.               | Present study |
| pCB494 | Amp <sup>R</sup> ; pCB481-based plasmid expressing the N-terminal half of eYFP (amino acids 1-154) fused to Jmjd6 (YN-Jmjd6) from the P <sub>CMV</sub> promoter.                 | Present study |
| pCB495 | Amp <sup>R</sup> ; pCB482-based plasmid expressing the C-terminal half of eYFP (amino acids 154-238) fused to Jmjd6 (YC-Jmjd6) from the P <sub>CMV</sub> promoter.               | Present study |
| pCB496 | Amp <sup>R</sup> ; pCB483-based plasmid expressing Jmjd6 fused to the N-terminal half of eYFP (amino acids 1-154) (Jmjd6-YN) from the P <sub>CMV</sub> promoter.                 | Present study |
| pCB497 | Amp <sup>R</sup> ; pCB484-based plasmid expressing Jmjd6 fused to the C-terminal half of eYFP (amino acids 154-238) (Jmjd6-YC) from the P <sub>CMV</sub> promoter.               | Present study |

|        |                                                                                                                                                                            |               |
|--------|----------------------------------------------------------------------------------------------------------------------------------------------------------------------------|---------------|
| pCB500 | Amp <sup>R</sup> ; pcDNA-Neo-based plasmid expressing C-terminally triple flag-tagged Jmjd6 <sup>N277A</sup> under the control of the mammalian P <sub>CMV</sub> promoter. | Present study |
| pCB501 | Amp <sup>R</sup> ; pcDNA-Neo-based plasmid expressing C-terminally triple flag-tagged Jmjd6 <sup>1-334</sup> under the control of the mammalian P <sub>CMV</sub> promoter. | Present study |
| pCB502 | Amp <sup>R</sup> ; pcDNA-Neo-based plasmid expressing C-terminally triple flag-tagged Jmjd6 <sup>1-290</sup> under the control of the mammalian P <sub>CMV</sub> promoter. | Present study |
| pCB531 | Amp <sup>R</sup> ; pACT2-based plasmid encoding Gal4-AD fused to <sup>ha</sup> Liat1 <sup>(41-228)</sup> under the control of the yeast P <sub>ADHI</sub> promoter.        | (2)           |

**Supplemental Table S2.** Primers used in this study

| <b>Primer</b> | <b>Primer's sequence (5' to 3')</b>               |
|---------------|---------------------------------------------------|
| CB200F        | GATCGCTAGCGCCACCATGTACCCATACGATGTTCTGAC           |
| CB443F        | GATCAAGCTTGCCACCATGGTGAGCAAGGGCGAGG               |
| CB444R        | GATCGGTACCAGTAGCAATCGATCGCATGATATAGACGTTGTGGCTG   |
| CB445F        | GATCAAGCTTGCCACCATGGCCGACAAGCAGAAGAACGGC          |
| CB446R        | GATCGGTACCAGTAGCAATCGATCGCTTGTACAGCTCGTCCATGCC    |
| CB447F        | GATCTCTAGACGATCGATTGCTACAATGGTGAGCAAGGGCGAGG      |
| CB448R        | GATCGGGCCCTCACATGATATAGACGTTGTGGCTG               |
| CB449F        | GATCTCTAGACGATCGATTGCTACAATGGCCGACAAGCAGAAGAACGGC |
| CB450R        | GATCGGGCCCTCACTTGTACAGCTCGTCCATGCC                |
| CB451F        | GATCGAATTCTGATGGCCTCGGTGGTGAATAC                  |
| CB452R        | GATCTCTAGATCAGTGTCTGAACAGCAGCATCC                 |
| CB453F        | GATCAAGCTTGCGCCATGGCCTCGGTGGTGAATAC               |
| CB454R        | GATCCTCGAGGTGTCTGAACAGCAGCATCC                    |
| CB455F        | GATCGAATTCTGATGGCCGGCCGTGGTGGG                    |
| CB456R        | GATCTCTAGATCACTCTGCTACAGTGGTGGCTAATTCTGGG         |
| CB457F        | GATCAAGCTTGCGCGATGGCCGGCCGTGGTGGG                 |
| CB458R        | GATCCTCGAGCTCTGCTACAGTGGTGGCTAATTCTGGG            |
| CB459F        | GATCGGTACCATGAACCACAAGAGCAAGAAGCGC                |
| CB460R        | GATCTCTAGATCACCTGGAGGAGCTGCGCTC                   |
| CB461F        | GATCAAGCTTGGCACCATGAACCACAAGAGCAAGAAGCGC          |
| CB462R        | GATCTCTAGACCTGGAGGAGCTGCGCTC                      |
| CB475F        | GTTGTCCTCGCCCTTGACACCACC                          |
| CB476R        | ATGCCACCATCCCCCTGGTACAAAGAC                       |
| CB477F        | TCCACAGGCATTGCCTCTGAC                             |
| CB478R        | CTCCTGGAGGTCAACTGCGTC                             |
| CB479F        | AGCACCAACTCCCTGTTGTG                              |
| CB480R        | GCTGGCAAAGTTCTGGGTGAT                             |
| AA01F         | GCGCGGAAGGCGGAGC                                  |
| AA02R         | ACCATACTCCGCCGACCGG                               |
| AA03F         | ACTAAAGGATCGGGCAAGGGCGAC                          |

AA04R CACCTTCCGTTTGGCCAGCTCG  
AA05R ATCGGTACCGAATAGGGAAGGGTTTGCCTATTTTCCTCTTTGTCTCTGGGC  
JD10 CACCGTGAATCGGAGAAAACGGTAC  
JD11 AAACGTACCGTTTTCTCCGATTCAC  
JD12 CACCGGTCGGGGTGAAGCCCTTGA  
JD13 AAACTCAAGGGCTTCCACCCCGACC

## References

1. Sanjana, N.E., Shalem, O., and Zhang, F. (2014). Improved vectors and genome-wide libraries for CRISPR screening. *Nature Methods* **11**, 783-784.
2. Brower, C.S., Rosen, C.E., Jones, R.H., Wadas, B.C., Piatkov, K.I., and Varshavsky, A. (2014). Liat1, an arginyltransferase-binding protein whose evolution among primates involved changes in the numbers of its 10-residue repeats. *Proceedings of the National Academy of Sciences of the United States of America* **111**, E4936-4945.
